# Supplementary material
Source: PubMed Central journal article supplement (PMC3784534)
Supplement: JCI67867sd.pdf [file JCI67867sd.pdf]

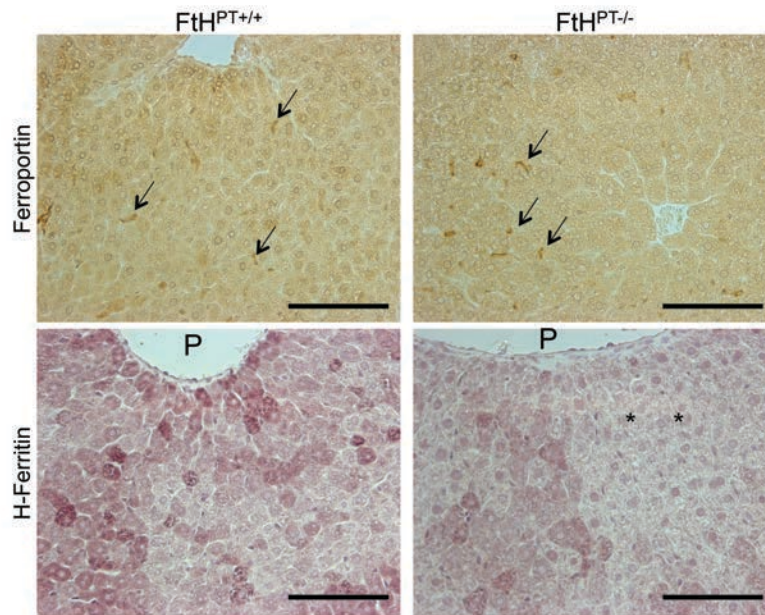

**Supplemental Figure 1. Hepatic expression of *FtH* and *FPN*.** (A) Immunohistochemical staining of livers from  $FtH^{PT+/+}$  and  $FtH^{PT-/-}$  mice. Arrows indicate positively stained Kupffer cells. Portal vein is indicated as P. Asterisk indicates periportal hepatocytes with decreased FPN expression. Scale bar represents 100  $\mu$ m.

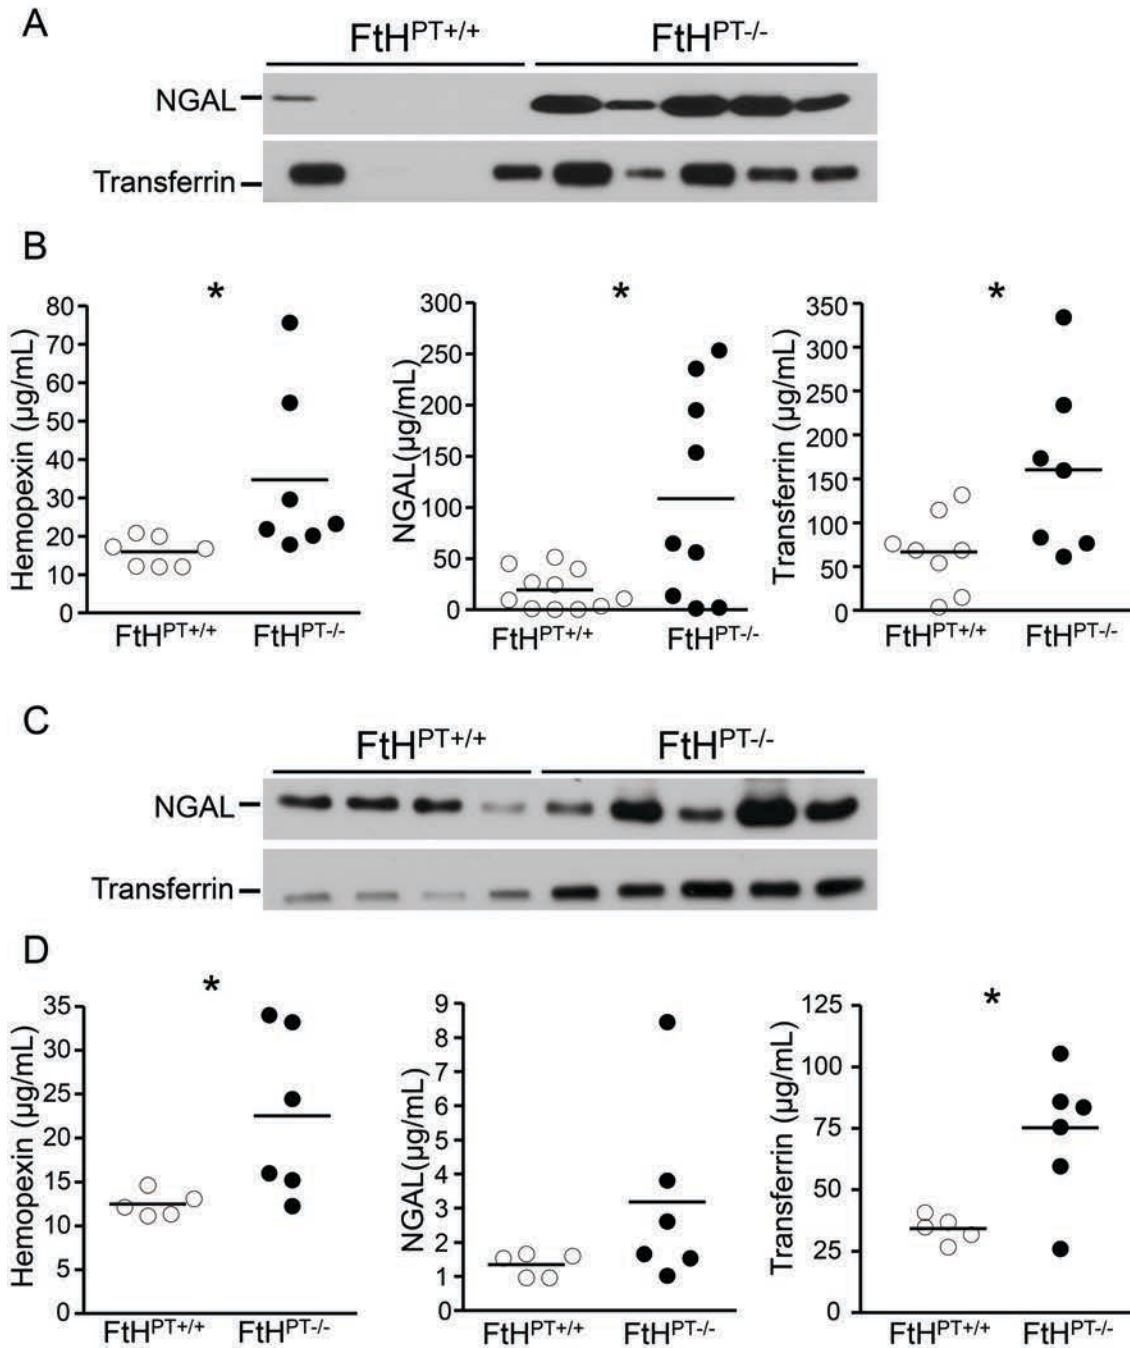

**Supplemental Figure 2. Urinary excretion of hemopexin, NGAL and transferrin during AKI is increased following FtH ablation in the proximal tubules of the kidney.** Urine from FtH<sup>PT+/+</sup> and FtH<sup>PT-/-</sup> mice that were administered Glycerol (A) or Cisplatin (C) was analyzed for NGAL and transferrin by western blot analysis. Hemopexin, NGAL and transferrin were measured by ELISA in the urine from FtH<sup>PT+/+</sup> and FtH<sup>PT-/-</sup> mice administered Glycerol (B) Cisplatin (D). Data were expressed as µg per ml. \*p < 0.05 vs FtH<sup>PT+/+</sup> mice.

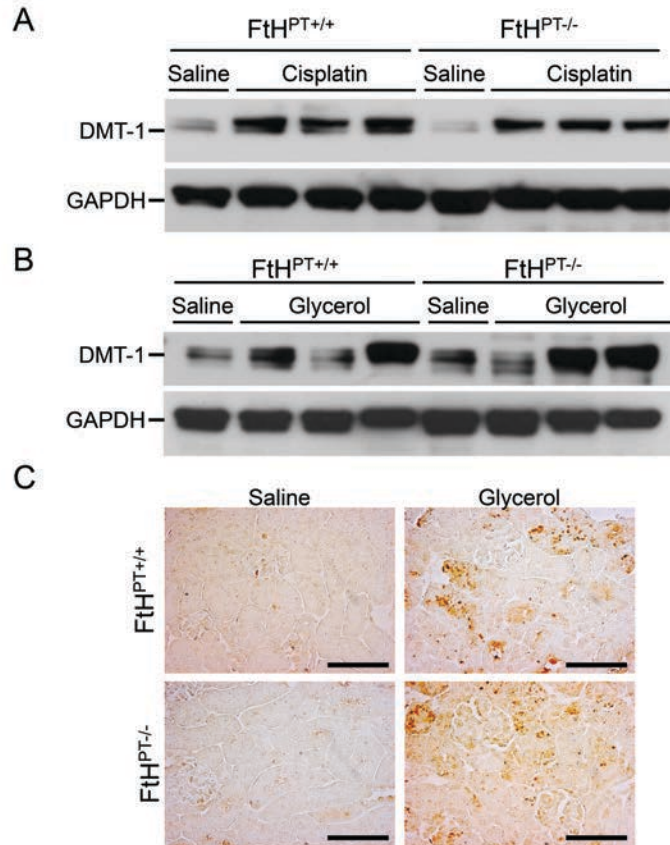

**Supplemental Figure 3. *FtH* does not modulate *DMT-1* expression during AKI.** DMT-1 expression in the kidneys of FtH<sup>PT+/+</sup> and FtH<sup>PT-/-</sup> mice was analyzed by western blot following Cisplatin (A) or Glycerol administration (B). (C) Immunohistochemical staining was performed to examine DMT-1 expression in the kidneys of FtH<sup>PT+/+</sup> and FtH<sup>PT-/-</sup> mice following saline or glycerol administration. Scale bar represents 50  $\mu$ m.

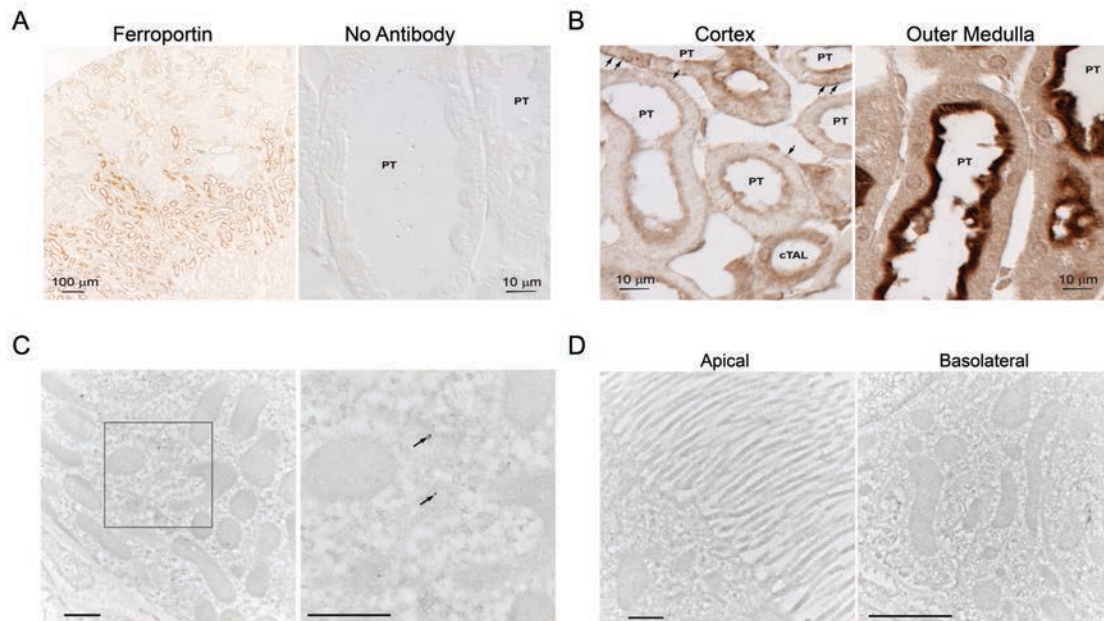

**Supplemental Figure 4. Ferroportin expression in uninjured kidneys of wild-type C57BL/6 mice.** (A) *Left panel* - FPN expression profile was validated in control C57BL/6 mice kidneys processed for immunohistochemistry, showing strongest immune-labeling in the outer stripe of the outer medulla and extending into the medullary rays in the inner cortex. *Right panel* – Differential interference contrast image of immunohistochemical stain without primary antibody. PT=Proximal tubules. (B) Representative immunohistochemical images for FPN expression in the cortex (left panel) and outer stripe of the outer medulla (right panel). PT=Proximal tubules and cTAL=cortical thick ascending limb. Arrows highlight tubules with small areas of staining in the basal region (left panel). (C) Immunoelectron micrograph of the basolateral compartment of a proximal tubule labeled for FPN, illustrating sparse gold particles in the mitochondria and cytoplasm. *Right panel* – higher magnification of the area shown in left panel. Arrows indicate gold particles. (D) Immunoelectron micrographs of negative controls without addition of primary antibody. Scale bar represents 500 nm for (C) and (D).
